# Supplementary material for: Predictors Of Perinatal Mortality In Ghana: A Multilevel Analysis Of 2022 Ghana Demographic And Health Survey
Source: Research Square preprint supplement (doi:10.21203/rs.3.rs-6472403/v1), 2025-05-21
Supplement: Supplementary file 1 [file 3d829311dd1eb1cdf1fcca5b.docx]

Supplementary Table 1: Variables and coding

| **Variables** | **Description** | **Categories/Codes** |
| --- | --- | --- |
| **Outcome variable** |  |  |
| Perinatal mortality | The death of a fetus at 28 weeks of gestation or more, before birth or death of a newborn within the first seven days after birth. | 0 = Perinatal mortality, 1 = no perinatal mortality |
| **Independent variables** |  |  |
| **Predisposing factors** | | |
| Sex of Child | Male or female of the child | 1 = Male, 2 = Female |
| Birth Order | Birth order of the child | 1 = First, 2 = 2-3, 3 = 4 or more |
| Age | Age group of women | 1 = 15-19, 2 = 20-24, 3 = 25-29, 4 = 30-34, 5 = 35-39, 6 = 40-44, 7 = 45-49 |
| Marital Status | Marital status of women | 0 = Never married, 1 = Married, 2 = Cohabitation, 3 = Widowed, 4 = Divorced |
| Religion | Respondent's religion | 1 = Christianity, 2 = Islam, 3 = No religion, 4 = Other |
| Educational Level | Educational status of woman | 0 = No education, 1 = Primary, 2 = Secondary, 3 = Higher |
| Sex of Household Head | Sex of household head | 1 = Male, 2 = Female |
| Clean Fuel for Cooking | Using clean fuel for cooking | 0 = No, 1 = Yes |
| Source of Drinking Water | Source of drinking water | 0 = Unimproved source, 1 = Improved source |
| Gestational Age at Registration | Number of months pregnant at first ANC registration | 0 = No ANC, 1 = First trimester, 2 = Second trimester, 3 = Third trimester |
| Number of ANC Visits | Number of ANC visits | 0 = None, 1 = <4 visits, 2 = 4-7 visits, 3 = 8+ visits |
| Received Iron Supplement | Iron supplement intake during pregnancy | 0 = No, 1 = Yes |
| Received Dewormer | Dewormer intake during pregnancy | 0 = No, 1 = Yes |
| Received TT2 | Received tetanus toxoid injections during last pregnancy | 0 = No, 1 = Yes |
| Took SP | Intestinal parasite treatment during pregnancy | 0 = No, 1 = Yes |
| Smokes Cigarette | Whether the mother smokes cigarettes | 0 = No, 1 = Yes |
| Drinks Alcohol | Alcohol consumption during pregnancy | 0 = Never drank alcohol, 1 = Low consumption, 2 = Moderate consumption, 3 = High consumption |
| **Enabling Factors** | | |
| Wealth Index | Wealth index category | 1 = Poorest, 2 = Poorer, 3 = Middle, 4 = Richer, 5 = Richest |
| Distance to Health Facility | Problem with distance to health facility | 1 = Big problem, 2 = Not a big problem |
| Place of Residence | Place of residence | 1 = Urban, 2 = Rural |
| Region | Region in Ghana | western, central, greater accra, volta, eastern, ashanti, western north, ahafo, bono, bono east, oti, northern, savannah, north east, upper east, upper west |
| Have Health Insurance | Having health insurance | 0 = No, 1 = Yes |
| Community Level of Wealth | Community wealth level | 1 = Low, 2 = High |
| **Need Factors** | | |
| Birth Weight | Baby's birth weight | 1 = Under weight, 2 = Normal weight, 3 = Over weight |
| Fever | Presence of fever | 0 = No fever, 1 = Had fever |
| Birth Interval | Length of time since last delivery | 0 = First delivery, 1 = <15 months, 2 = 15-26 months, 3 = 27-38 months, 4 = 39 or more months |
| Parity | Number of children | 0 = 0, 1 = 1, 2 = 2-3, 3 = 4 and above |
| **Multilevel Analysis Variables** | | |
| **Individual level factors:** sex of the child, birth order, age of the mother, marital status, religion, educational level, sex of the household head, clean fuel use for cooking, source of drinking water, gestational age at registration, number of antenatal care (ANC) visits, receipt of iron supplements, deworming, tetanus toxoid (TT2) injections, intake of sulfadoxine-pyrimethamine (SP), smoking habits, and alcohol consumption | | |
| **Community level factors:** Place of residence, region, community level of wealth, distance to health facility | | |
