# Supplementary material for: Predictors Of Perinatal Mortality In Ghana: A Multilevel Analysis Of 2022 Ghana Demographic And Health Survey
Source: Research Square preprint supplement (doi:10.21203/rs.3.rs-6472403/v1), 2025-05-21
Supplement: Supplementary file 2 [file 72a6e162dbf8b7615c2d69c9.docx]

Supplementary table 2: GVIF table

| **Variable** | **VIF** | **1/VIF** | **GVIF** |
| --- | --- | --- | --- |
| Pregnancy interval | 1.34 | 0.744023 | 1.7956 |
| Age | 1.34 | 0.744109 | 1.7956 |
| Community wealth | 1.11 | 0.904236 | 1.2321 |
| Took dewormer during pregnancy | 1.09 | 0.917652 | 1.1881 |
| Took iron supplement during pregnancy | 1.09 | 0.918852 | 1.1881 |
| Birth weight | 1.09 | 0.92011 | 1.1881 |
| Distance to health facility | 1.07 | 0.933726 | 1.1449 |
| Received 2 or more TT during | 1.05 | 0.949176 | 1.1025 |
| Child had fever | 1.02 | 0.975841 | 1.0404 |
| Marital status | 1.01 | 0.988988 | 1.0201 |
| Smoking | 1 | 0.997705 | 1 |
| Sex of child | 1 | 0.998591 | 1 |
